# Supplementary material
Source: Royal Society of Chemistry journal article supplement (https://www.rsc.org/suppdata/cp/1999/127/f805190i.doc)
Supplement: Supplementary file 1 [file f805190i.doc]

Table 2. Results from measurements of the vapour pressure *p* by the transpiration method.

| *T*/Ka | *m*/mgb | *V*(N2) /dm3 c | *p*/Pad |  | *T*/Ka | *m*/mgb | *V*(N2) /dm3 c | *p*/Pad |
| --- | --- | --- | --- | --- | --- | --- | --- | --- |

2-methyl-hydroquinone, ln(*p*/Pa) = 34.37 - 11694.(*T*/K) -1

| 333.2 | 3.24 | 131.4 | 0.4965 | 353.3 | 7.22 | 39.20 | 3.679 |
| --- | --- | --- | --- | --- | --- | --- | --- |
| 338.8 | 5.63 | 136.8 | 0.8254 | 358.4 | 15.3 | 50.83 | 6.004 |
| 343.6 | 12.2 | 184.5 | 1.324 | 363.4 | 15.2 | 34.47 | 8.811 |
| 348.1 | 7.01 | 64.21 | 2.184 | 368.3 | 4.93 | 7.48 | 13.17 |

(350.7 K) = (97.21.4) kJ.mol-1; (298.15 K) = (100.41.4) kJ.mol-1

2-*tert*-butyl-hydroquinone, ln(*p*/Pa) = 35.21 - 12175.(*T*/K) -1

| 333.4 | 1.17 | 63.02 | 0.2796 | 353.2 | 4.82 | 35.40 | 2.031 |
| --- | --- | --- | --- | --- | --- | --- | --- |
| 338.4 | 2.55 | 80.65 | 0.4727 | 358.2 | 5.58 | 25.12 | 3.311 |
| 343.5 | 3.59 | 70.89 | 0.7569 | 363.3 | 4.40 | 11.46 | 5.729 |
| 348.4 | 3.60 | 43.60 | 1.234 | 368.4 | 3.89 | 6.60 | 8.784 |

(350.9 K) = (101.21.3) kJ.mol-1; (298.15 K) = (104.41.3) kJ.mol-1

2,5-di-*tert*-butyl-hydroquinone, ln(*p*/Pa) = 38.17 - 14288.(*T*/K) -1

| 333.2 | 0.101 | 135.3 | 0.008331 | 353.3 | 0.385 | 40.00 | 0.1072 |
| --- | --- | --- | --- | --- | --- | --- | --- |
| 338.8 | 0.240 | 139.5 | 0.01920 | 358.4 | 0.865 | 51.85 | 0.1859 |
| 343.6 | 0.547 | 188.3 | 0.03239 | 363.4 | 0.950 | 35.17 | 0.3011 |
| 348.1 | 0.351 | 65.51 | 0.05970 | 368.4 | 0.365 | 7.63 | 0.5331 |

(350.8 K)= (118.81.7) kJ.mol-1; (298.15 K)= (122.01.7) kJ.mol-1

a Temperature of saturation*,* N2 gas flow (0*.*26 to 0.52) cm3·s-1. b Mass of transferred sample condensed at *T* = 243 K. c Volume of nitrogen used to transfer sample. c Volume of nitrogen used to transfer mass *m* of sample. d Vapour pressure at temperature *T*, calculated from *m* and the residual vapour pressure at *T* = 243 K.
